# Supplementary material for: Functionalization of commercial pigment Hostasol Red GG for incorporation into organic thin-film transistors
Source: Royal Society of Chemistry journal article supplement (doi:10.1039/c9nj04851k), 2019-12-10
Supplement: c9nj04851k1.pdf [file c9nj04851k1.pdf]

# Functionalization of Commercial Pigment Hostasol Red GG for Incorporation into Organic Thin-Film Transistors

*Owen A. Melville,<sup>1</sup> Trevor M. Grant,<sup>1</sup> Nicole A. Rice,<sup>1</sup> Bowen Wang,<sup>1</sup> Pierre Josse,<sup>1</sup> Benoît H. Lessard<sup>1,\*</sup>*

<sup>1</sup> University of Ottawa, Department of Chemical and Biological Engineering,  
161 Louis Pasteur, Ottawa, Ontario, K1N 6N5

\*To whom correspondences should be addressed. E-mail: [benoit.lessard@uottawa.ca](mailto:benoit.lessard@uottawa.ca)

**Supplementary Information**

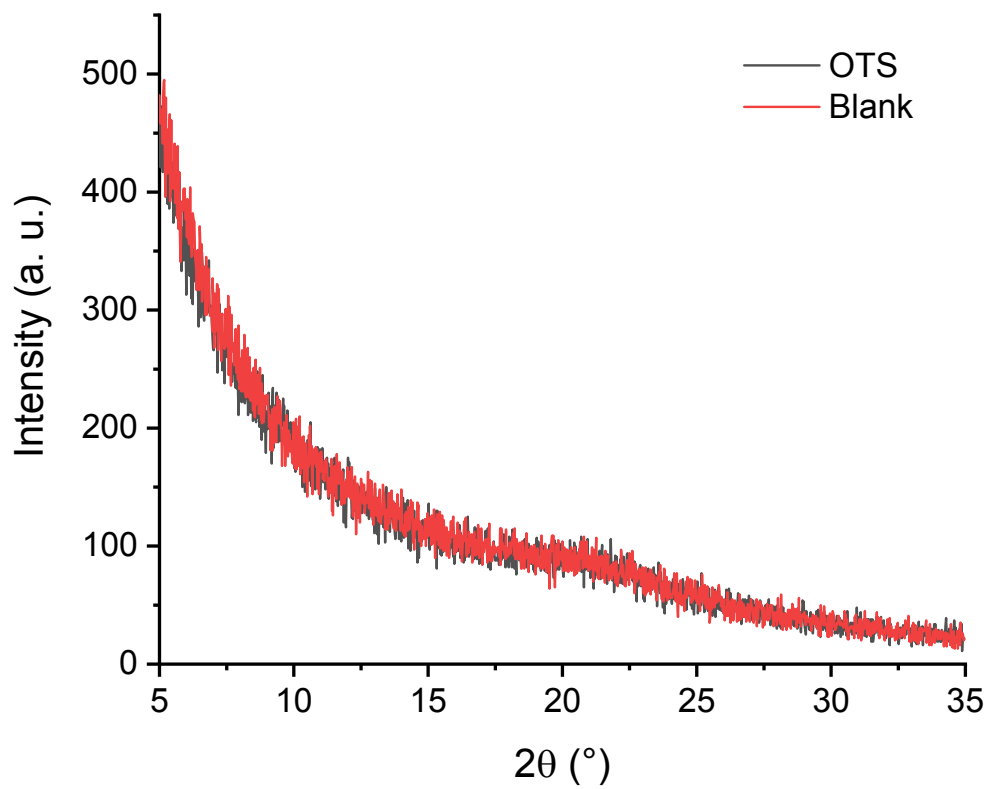

**Figure S1:** X-ray diffraction (XRD) scans of thin films of **6** on octyltrichlorosilane (OTS) modified SiO<sub>2</sub> and a blank control with no film.

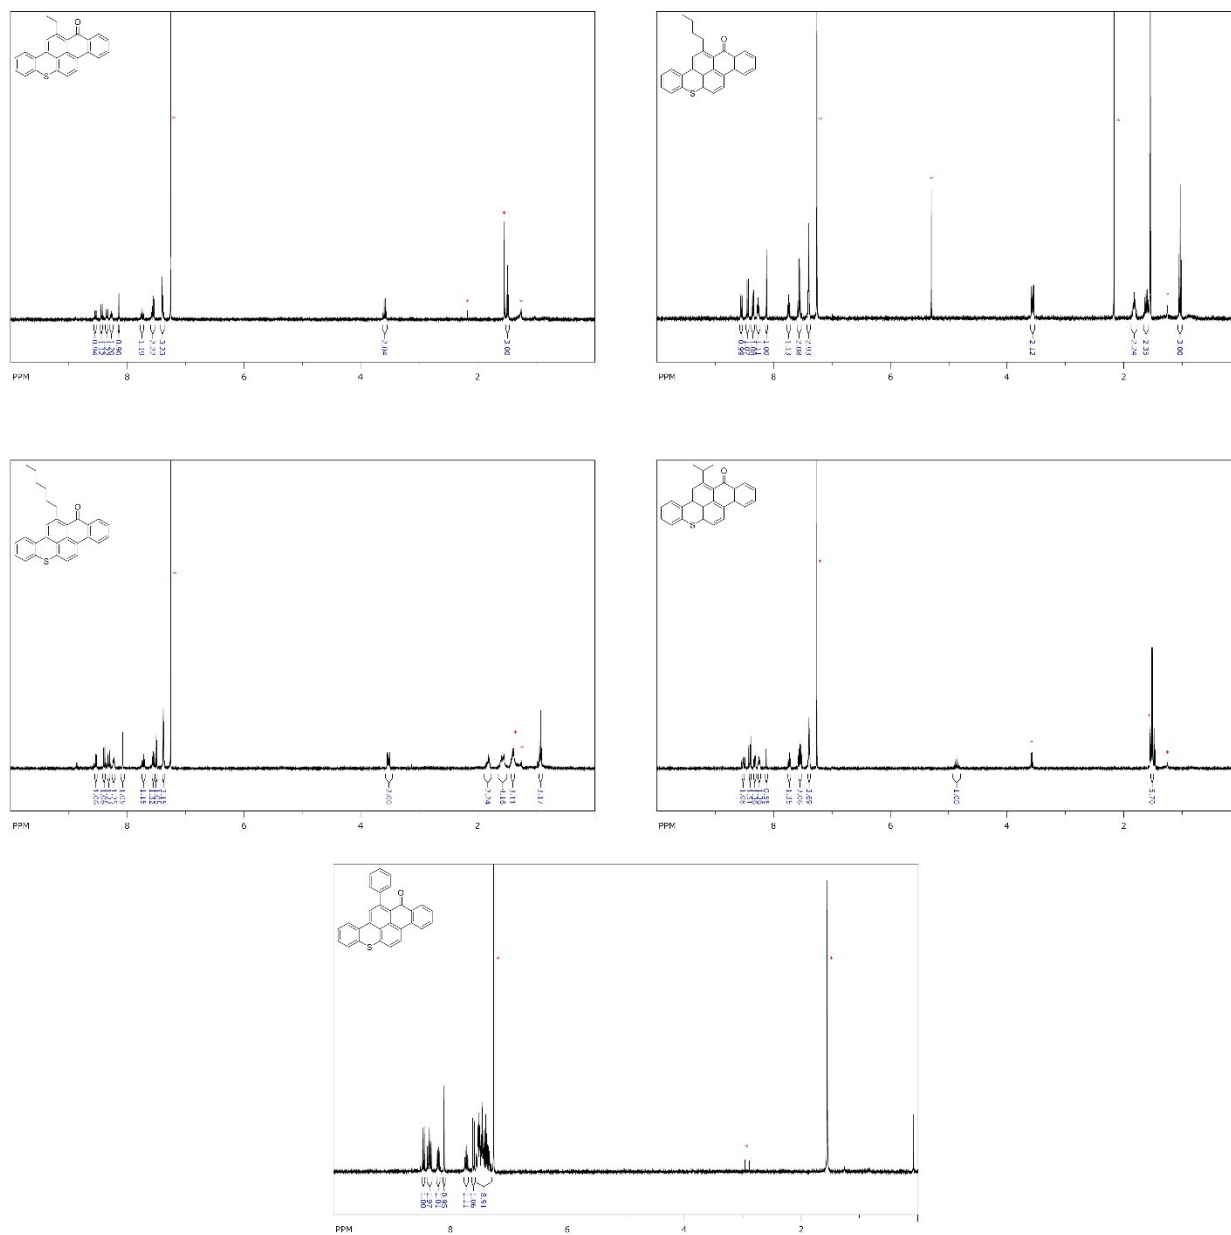

**Figure S2:**  $^1\text{H}$  NMR spectra for the novel compounds synthesized in this study prior to sublimation.

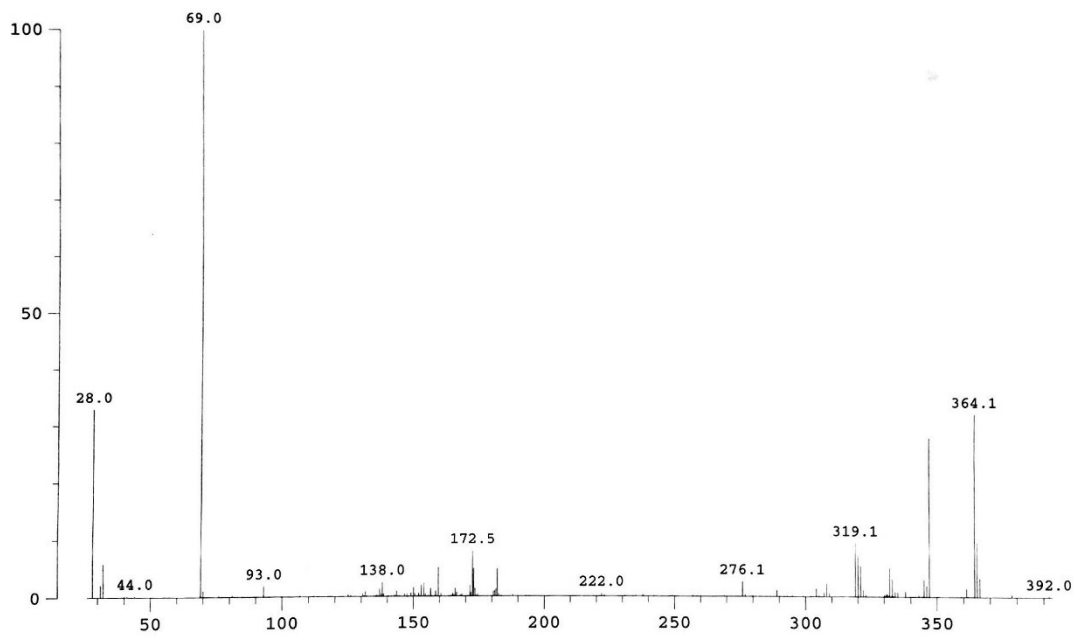

**Figure S3:** Mass spectrum for material 2

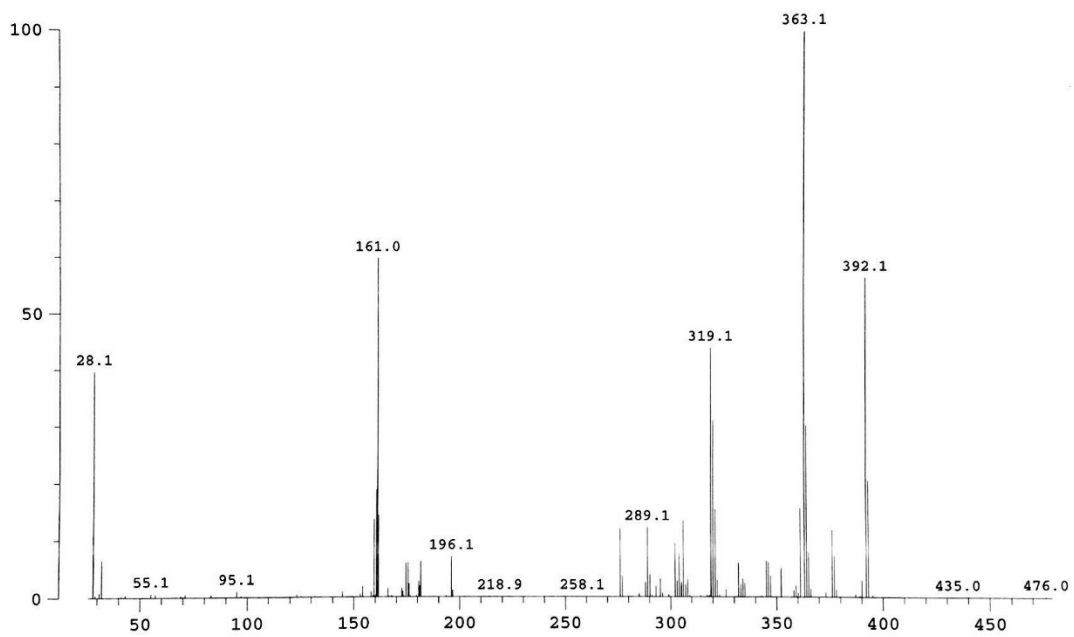

**Figure S4:** Mass spectrum for material 3

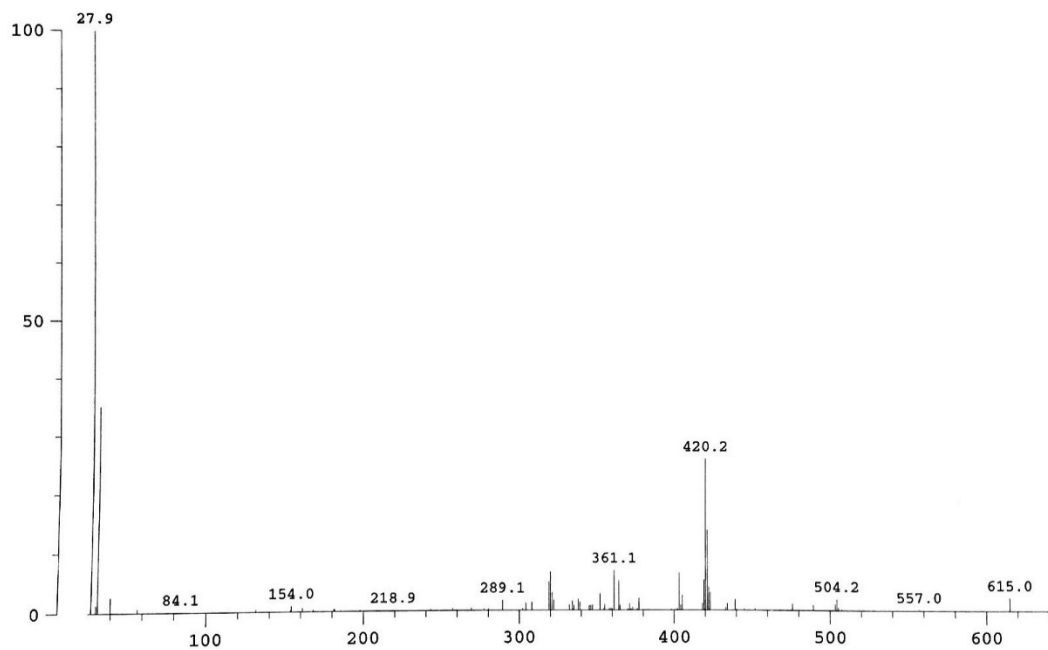

**Figure S5:** Mass spectrum for material 4

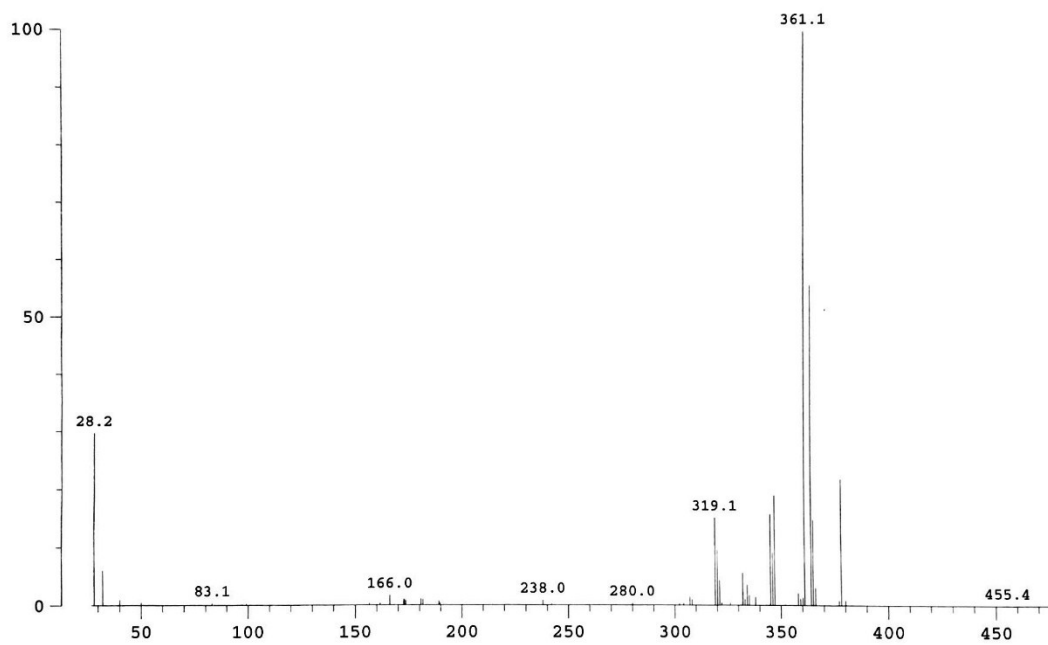

**Figure S6:** Mass spectrum for material 5

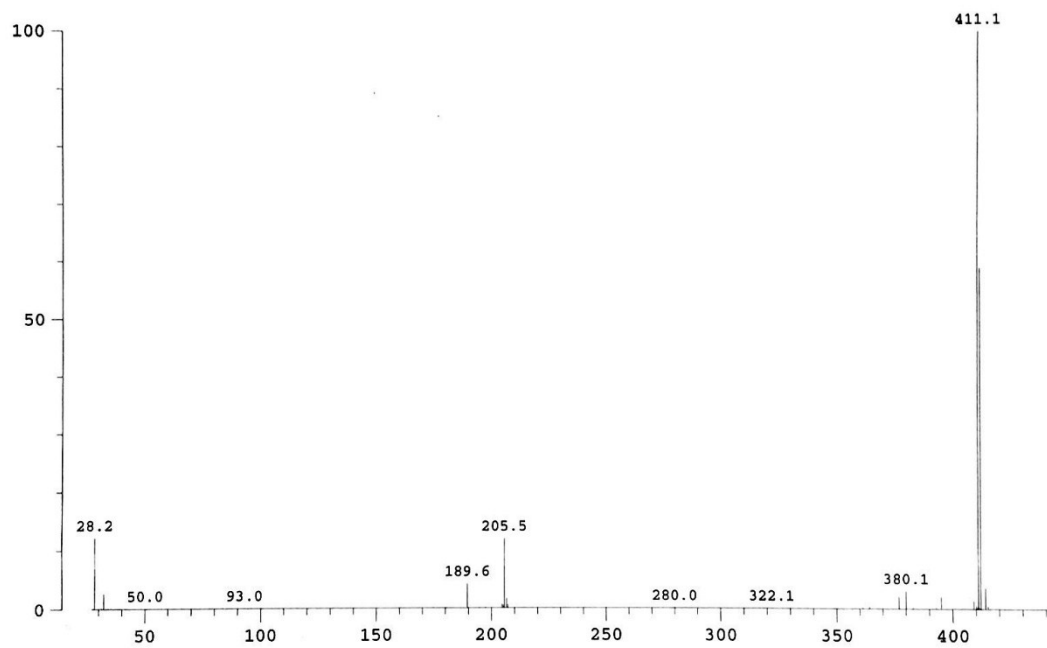

**Figure S7:** Mass spectrum for material 6
